# Supplementary material
Source: publisher figshare collection journal article supplement (https://plos.figshare.com/articles/dataset/_/1452162)

### RSV F

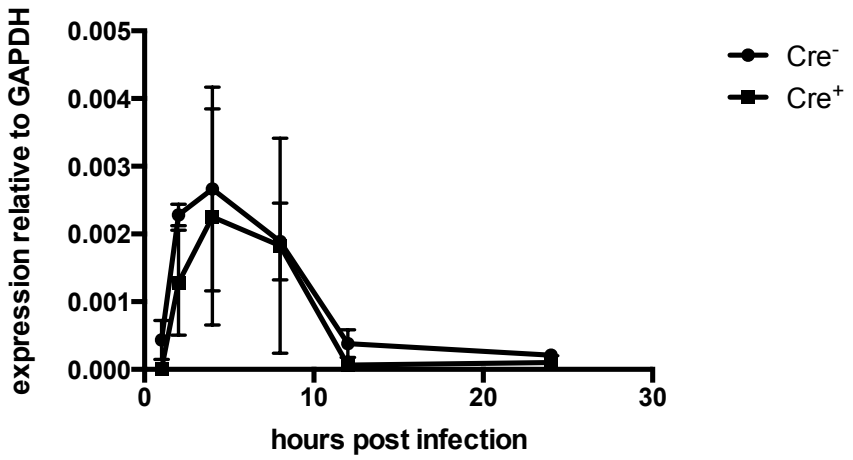

### RSV G

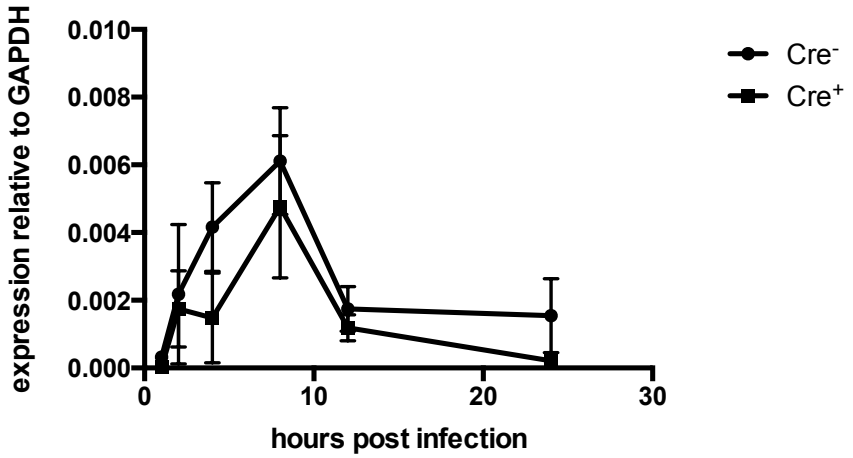

### RSV N

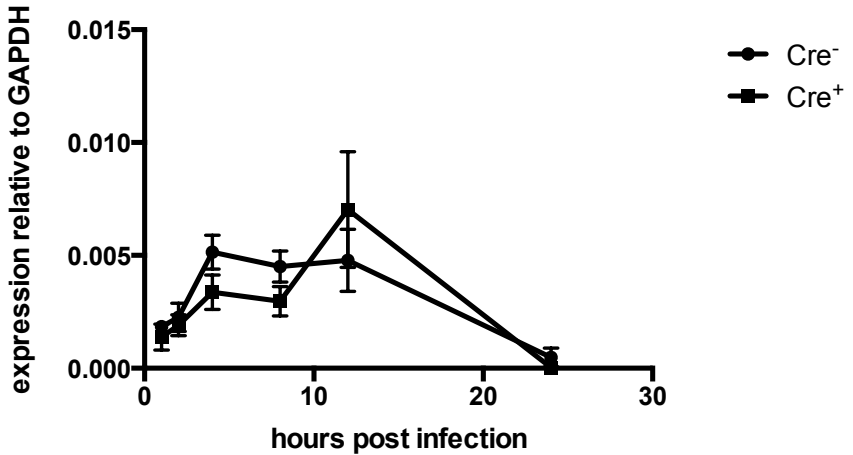

Supplement: Supplementary file [file 1]
